# Supplementary material for: Risk factors for long-term survival in patients with ypN+ M0 rectal cancer after radical anterior resection
Source: BMC Gastroenterol. 2022 Mar 26;22:141. doi: 10.1186/s12876-022-02226-9 (PMC8961971; doi:10.1186/s12876-022-02226-9)
Supplement: Supplementary file 5 — Additional file 5. Dataset. [file 12876_2022_2226_MOESM5_ESM.xlsx]

## Sheet: Arkusz1
							v1	v2	v3	v4	v5	v6	v7	v8	v9	v10	v11	v12	v13	v14	v15	v16	v17	v18	v19	v20	v21	v22	v23	v24	v25	v26	v27	v28	v29	v30	v31	v32	v33	v34	v35	v36	v37	v38	v39	v40	v41	v42	v43
Pt No	OS	OS C	DSS	DSS C	DFS	DFS C	SEX	AGE	BMI	BSA	CAD	HA	DIAB	INSULIN	CCI	CCI>2	alfa-Blok	beta-Blok	ACE inh	Ca-Blok	Diur	Ant-Ang	Statin	Nitr	METF	GLIME	GLIKL	cT	cN	RT SCH	Neoadj	RT-OP >= 6 weeks	Dist to av	ILEO	COMPL 0/1	AL.	Early/late AL.	AL. Hartman	CLAV>2	G	MUC 0/1	ypT	DEPO 0/1	Liczba N+	Liczba N-	LNY	LNY>=12	ypN 1/2	LNR
1	83.1475	0	83	0	83.1475	0	2	60	26.5	2.02	0	0	0	0	2	0	0	0	0	0	0	0	0	0	0	0	0	3	1	1	2	0	1	1	0	0	0	0	0	2	0	3	0	2	2	4	0	1	0.5
2	107.967	0	108	0	94.9836	0	1	79	26.5	1.62	0	1	1	0	3	1	0	0	0	0	0	0	0	0	0	1	0	1	1	2	2	0	2	0	1	1	2	1	1	2	0	2	0	1	9	10	0	1	0.1
3	110.098	0	110	0	87.5082	0	2	69	30.4	1.99	0	0	0	0	2	0	0	0	0	0	0	0	0	0	0	0	0	3	1	1	2	0	2	1	0	0	0	0	0	1	0	3	1	4	7	11	0	2	0.363636
4	72.3607	1	72	0	67.6066	0	2	54	22.2	2.11	0	0	0	0	2	0	0	0	0	0	0	0	0	0	0	0	0	2	0	1	2	0	1	1	1	0	0	0	0	2	0	3	1	4	36	40	1	2	0.1
5	44.8525	1	45	0	42.5246	0	2	69	30.7	2.1	0	1	0	0	2	0	0	1	1	0	0	0	0	0	0	0	0	2	1	1	2	0	2	0	0	0	0	0	0	2	0	3	0	3	19	22	1	1	0.136364
6	41.9016	1	42	1	34	1	1	85	19.7	1.38	0	0	0	0	2	0	0	0	0	0	0	0	0	0	0	0	0	2	0	1	2	0	2	0	0	0	0	0	0	2	0	2	0	2	5	7	0	1	0.285714
7	27.6066	1	28	1	9	1	2	76	26.1	1.94	0	1	0	0	2	0	1	1	0	1	0	0	0	0	0	0	0	3	1	1	2	0	2	0	1	1	2	1	1	2	0	3	1	4	9	13	1	2	0.307692
8	35.2787	1	35	1	29	1	2	59	30.4	2.07	0	0	0	0	2	0	0	0	0	0	0	0	0	0	0	0	0	3	1	1	2	0	2	0	1	0	0	0	0	2	0	3	1	1	16	17	1	1	0.0588235
9	8.45902	1	8	0	8	0	2	61	24.2	1.81	0	1	0	0	2	0	0	1	0	0	0	0	0	0	0	0	0	3	1	1	2	0	3	0	1	1	1	2	1	2	0	3	1			21	1	1
10	104.721	0	105	0	32	1	2	64	26.1	1.94	0	1	0	0	2	0	0	1	0	1	1	0	0	1	0	0	0	3	0	1	2	0	1	1	1	0	0	0	0	2	0	3	1	12	21	33	1	2	0.363636
11	50.5574	1	51	1	39	1	2	50	25.95	1.86	0	0	0	0	2	0	0	0	0	0	0	0	0	0	0	0	0	3	1	2	2	1	2	1	1	1	1	1	1	x	0	3	0	13	6	19	1	2	0.684211
12	79.8689	0	80	0	80	0	1	47	26.95	1.72	0	0	0	0	2	0	0	0	0	0	0	0	0	0	0	0	0	3	1	2	3	1	1	0	1	0	0	0	1	2	0	3	1	9	13	22	1	2	0.409091
13	46.2623	0	46	0	46.2623	0	2	62	26.8	1.98	0	0	0	0	2	0	0	0	0	0	0	0	0	0	0	0	0	3	1	2	2	1	2	0	0	0	0	0	0	2	0	2	0	9	7	16	1	2	0.5625
14	76.5574	0	77	0	27	1	2	59	24.3	1.85	0	0	0	0	2	0	0	0	0	0	0	0	0	0	0	0	0	3	1	2	3	1	3	0	0	0	0	0	0	2	0	3	0	7	7	14	1	2	0.5
15	61.377	1	61	1	27	1	1	59	26.8	1.62	0	1	1	0	3	1	0	1	0	0	0	0	0	0	0	0	1	3	1	2	2	0	2	0	1	1	1	2	1	2	0	3	0	6	6	12	1	2	0.5
16	85.1475	0	85	0	67.7705	0	1	43	26	1.76	0	0	0	0	2	0	0	0	0	0	0	0	0	0	0	0	0	3	1	2	3	1	2	0	0	0	0	0	0	2	0	3	0	5	8	13	1	2	0.384615
17	80.4918	0	80	0	31.9016	0	2	51	28.96	2.19	0	0	0	0	2	0	0	0	0	0	0	0	0	0	0	0	0	3	1	2	3	1	2	1	0	0	0	0	0	1	0	3	0	4	4	8	0	2	0.5
18	59.7377	1	60	1	46	1	2	68	30.8	1.97	0	1	0	0	2	0	0	1	1	0	0	0	0	1	0	0	0	3	1	2	3	1	1	1	0	0	0	0	0	x	0	2	0	3	3	6	0	1	0.5
19	58.9836	1	59	1	55	1	1	58	24	1.61	0	1	0	0	2	0	0	1	1	0	0	0	0	0	0	0	0	3	1	2	3	1	3	0	0	0	0	0	0	3	1	3	1	3	7	10	0	1	0.3
20	58.9508	0	59	0	58.9508	0	1	68	25.1	1.69	0	1	0	0	2	0	0	1	0	0	0	0	0	0	0	0	0	3	1	2	2	1	1	0	1	1	2	1	1	2	0	3	0	3	8	11	0	1	0.272727
21	60.5246	0	61	0	37.1475	0	2	64	24.2	1.81	0	0	0	0	2	0	0	0	0	0	0	0	0	0	0	0	0	3	1	2	3	1	2	0	0	0	0	0	0	2	0	2	0	3	2	5	0	1	0.6
22	58.8852	0	59	0	14.1311	0	2	68	23	1.8	0	0	1	0	3	1	0	0	0	0	0	0	0	0	1	1	0	3	1	2	3	0	1	0	1	0	0	0	0	2	0	3	0	3	15	18	1	1	0.166667
23	30.4918	1	30	1	17	1	1	67	34.2	1.84	0	1	0	0	2	0	0	1	0	0	1	0	0	0	0	0	0	3	1	2	2	1	2	0	0	0	0	0	0	2	0	3	0	3	10	13	1	1	0.230769
24	70	0	70	0	70	0	1	66	25.4	1.68	0	1	0	0	2	0	0	0	1	0	0	0	0	0	0	0	0	3	1	2	2	1	3	0	0	0	0	0	0	2	0	3	0	2	15	17	1	1	0.117647
25	72.5246	0	73	0	73	0	1	58	22.5	1.52	0	0	0	0	2	0	0	0	0	0	0	0	0	0	0	0	0	3	1	2	3	1	1	0	0	0	0	0	0	2	0	3	0	1	14	15	1	1	0.0666667
26	62.1639	1	62	1	44	1	1	72	23.4	1.69	0	0	0	0	2	0	0	0	0	0	0	0	0	0	0	0	0	3	1	2	2	1	2	0	0	0	0	0	0	2	0	3	0	1	7	8	0	1	0.125
27	84.5574	0	85	0	8.16393	0	2	79	26.1	1.96	0	0	0	0	2	0	0	0	0	0	0	0	0	0	0	0	0	3	0	2	3	0	1	0	0	0	0	0	0	x	0	3	0	1	8	9	0	1	0.111111
28	78.4262	0	78	0	64.7213	0	1	64	24.5	1.78	0	1	0	0	2	0	0	1	0	0	0	0	0	0	0	0	0	3	1	2	3	1	2	0	0	0	0	0	0	2	0	2	0	1	10	11	0	1	0.0909091
29	3.57377	1	4	0	3.01639	0	2	70	32.7	2.15	0	1	1	0	5	1	0	1	1	1	0	0	0	0	0	1	0	3	1	2	3	0	3	1	1	0	0	0	0	2	0	3	0	1	11	12	1	1	0.0833333
30	75.4426	0	75	0	56.8525	0	1	67	20.9	1.4	0	0	0	0	2	0	0	0	0	0	0	0	0	0	0	0	0	3	1	2	2	1	1	0	0	0	0	0	0	2	0	3	0	1	14	15	1	1	0.0666667
31	18.4262	1	18	0	14.1311	0	1	75	21.4	1.5	0	1	1	0	3	1	0	0	1	0	0	0	0	0	1	0	1	3	1	2	2	1	2	1	1	1	1	2	1	2	0	3	0	1	4	5	0	1	0.2
32	66.0984	0	66	0	66.0984	0	2	66	26.4	1.95	0	1	1	1	3	1	0	0	0	1	0	0	0	0	0	0	0	3	1	2	2	1	3	0	0	0	0	0	0	1	0	3	0	1	23	24	1	1	0.0416667
33	58.918	0	59	0	57.9016	0	1	55	28	1.72	0	1	0	0	2	0	0	1	0	0	0	1	0	0	0	0	0	3	0	2	3	1	2	0	0	0	0	0	0	2	0	3	0	1	6	7	0	1	0.142857
34	24.3607	1	24	1	14	1	1	69	29.6	1.8	0	1	1	0	3	1	0	0	1	1	1	0	0	0	1	1	0	3	1	2	3	1	2	0	0	0	0	0	0	3	1	3	1			6	0	1
35	98.5574	1	99	1	46	1	2	42	25.2	1.95	0	0	0	0	2	0	0	0	0	0	0	0	0	0	0	0	0	3	1	2	2	0	2	0	0	0	0	0	0	2	0	3	1	11	4	15	1	2	0.733333
36	76.0984	1	76	1	39	1	2	60	29.4	2.02	0	0	0	0	2	0	0	0	0	0	0	0	0	0	0	0	0	3	0	2	2	0	3	0	0	0	0	0	0	2	0	3	1	2	2	4	0	1	0.5
37	23.7705	1	24	1	6	1	2	73	38.7	2.42	0	1	0	0	2	0	0	1	1	0	0	0	0	0	0	0	0	3	1	1	2	0	2	1	1	0	0	0	0	3	0	3	0	23	12	35	1	2	0.657143
38	15.0492	1	15	1	12	1	1	67	26	1.69	0	1	0	0	2	0	0	0	1	1	0	0	0	0	0	0	0	3	1	1	2	0	1	1	1	1	1	2	1	3	1	3	1	13	3	16	1	2	0.8125
39	50.0328	0	50	0	34	0	2	79	26.1	1.96	0	1	0	0	2	0	0	1	1	0	1	0	0	0	0	0	0	3	1	1	2	1	3	0	0	0	0	0	0	2	0	3	1	10	11	21	1	2	0.47619
40	62	1	62	1	50	1	1	59	22.5	1.59	0	0	0	0	2	0	0	0	0	0	0	0	0	0	0	0	0	3	1	1	2	0	2	0	0	0	0	0	0	2	0	3	1	8	7	15	1	2	0.533333
41	3.14754	1	3	0	3	0	1	76	25.9	1.63	0	1	0	0	2	0	0	0	1	0	0	1	0	1	0	0	0	3	1	1	2	0	3	0	0	0	0	0	0	2	0	3	0	7	10	17	1	2	0.411765
42	47.8689	0	48	0	48	0	2	57	30.8	2.02	0	1	1	0	3	1	0	0	0	0	0	1	0	0	1	1	0	3	0	1	2	0	2	0	1	1	1	2	1	2	0	3	1	7	8	15	1	2	0.466667
43	17.1475	1	17	1	6	1	2	55	20.8	1.68	0	0	0	0	2	0	0	0	0	0	0	0	0	0	0	0	0	3	1	1	2	0	1	1	1	0	0	0	0	2	0	3	0	6	5	11	0	2	0.545455
44	71.3443	0	71	0	71.3443	0	2	55	27	1.92	0	1	0	0	2	0	0	0	0	0	0	1	0	0	0	0	0	3	1	1	2	0	1	1	0	0	0	0	0	2	0	3	1	5	25	30	1	2	0.166667
45	85.9672	0	86	0	50.2951	0	1	62	21.3	1.63	0	1	0	0	2	0	0	1	1	0	0	0	1	0	0	0	0	3	1	1	2	0	1	1	1	0	0	0	0	1	0	2	0	4	2	6	0	2	0.666667
46	27.9344	1	28	1	23	1	2	83	30.4	2.03	0	1	0	0	2	0	0	0	0	1	1	0	0	0	0	0	0	2	1	1	2	1	2	0	0	0	0	0	0	2	0	3	0	4	4	8	0	2	0.5
47	67.3443	0	67	0	36	1	1	69	25.6	1.65	0	0	0	0	2	0	0	0	0	0	0	0	0	0	0	0	0	3	1	1	2	1	2	0	0	0	0	0	0	2	0	3	0	3	15	18	1	1	0.166667
48	97.9016	0	98	0	88	0	1	69	20.4	1.58	0	0	0	0	2	0	0	1	0	0	0	0	0	0	0	0	0	3	1	1	2	0	2	0	0	0	0	0	0	2	0	3	0	3	8	11	0	1	0.272727
49	81.0164	0	81	0	12	1	2	54	21.5	1.78	0	0	0	0	2	0	0	0	0	0	0	0	0	0	0	0	0	3	1	1	2	0	2	0	0	0	0	0	0	2	0	3	0	2	19	21	1	1	0.0952381
50	77.4426	0	77	0	77	0	1	54	28.4	1.94	0	0	0	0	2	0	0	0	0	0	0	0	0	0	0	0	0	3	1	1	2	1	2	0	0	0	0	0	0	2	0	3	0	2	4	6	0	1	0.333333
51	57.0492	1	57	1	52	1	2	61	27.2	2.12	0	0	0	0	2	0	0	0	0	0	0	0	0	0	0	0	0	2	1	1	2	1	3	0	1	1	2	1	1	2	0	3	0	2	8	10	0	1	0.2
52	16.0984	1	16	1	5	1	1	61	27.6	1.88	0	1	0	0	2	0	0	1	0	0	0	0	0	0	0	0	0	3	1	1	2	1	1	0	1	1	1	2	1	2	1	3	0	2	8	10	0	1	0.2
53	41.7377	1	42	1	41	1	2	67	32.3	2.16	0	1	0	0	2	0	0	1	0	0	0	0	0	0	0	0	0	3	1	1	2	0	3	0	0	0	0	0	0	2	0	3	0	2	20	22	1	1	0.0909091
54	52.5574	0	53	0	38	0	2	57	20.7	1.81	0	0	0	0	2	0	0	0	0	0	0	0	0	0	0	0	0	3	1	1	2	1	1	0	0	0	0	0	0	2	0	3	0	2	11	13	1	1	0.153846
55	76.459	1	76	1	34	1	2	76	24.9	1.83	0	0	0	0	2	0	0	0	0	0	0	0	0	0	0	0	0	3	1	1	2	0	2	0	1	1	1	2	1	2	0	3	0	2	8	10	0	1	0.2
56	80.1311	1	80	1	74	1	1	56	43.5	2.31	0	1	1	0	3	1	0	1	0	0	0	0	0	0	1	0	0	3	1	1	2	0	2	0	1	0	0	0	0	2	0	2	0	2	13	15	1	1	0.133333
57	81.6393	0	82	0	63	0	1	73	21.4	1.65	0	0	1	0	3	1	0	0	0	0	0	0	0	0	0	0	1	3	1	1	2	1	1	0	0	0	0	0	0	2	0	3	0	1	15	16	1	1	0.0625
58	86.623	0	87	0	8	1	2	56	28	1.93	0	0	0	0	2	0	0	0	0	0	0	0	0	0	0	0	0	2	1	1	2	0	1	0	1	0	0	0	0	2	0	3	1	1	12	13	1	1	0.0769231
59	63.2459	0	63	0	63.2459	0	1	49	25.8	1.53	0	0	0	0	2	0	0	0	0	0	0	0	0	0	0	0	0	3	1	1	2	0	1	0	1	1	2	2	1	2	0	3	1	1	15	16	1	1	0.0625
60	63.1148	0	63	0	38.918	0	2	80	24.6	1.96	1	0	0	0	3	1	0	0	0	0	0	0	0	0	0	0	0	3	1	1	2	1	2	0	0	0	0	0	0	2	0	3	0	1	8	9	0	1	0.111111
61	42.3279	0	42	0	42.3279	0	2	56	30.7	1.89	0	0	0	0	2	0	0	0	0	0	0	0	0	0	0	0	0	3	1	1	2	1	1	1	0	0	0	0	0	2	0	2	0	1	11	12	1	1	0.0833333
62	43.5082	0	44	0	43.5082	0	2	60	24.3	1.95	0	0	0	0	2	0	0	0	0	0	0	0	0	0	0	0	0	3	1	1	2	0	2	0	1	1	1	1	1	2	0	3	0	1	19	20	1	1	0.05
63	92.7213	0	93	0	61.5082	0	2	65	24.6	1.85	0	0	0	0	2	0	1	0	0	0	0	0	0	0	0	0	0	3	1	1	2	1	3	0	0	0	0	0	0	2	0	3	0	1	3	4	0	1	0.25
64	91.7049	0	92	0	77.2787	0	1	63	27	1.75	0	0	0	0	2	0	0	0	0	0	0	0	0	0	0	0	0	3	0	1	2	1	2	0	0	0	0	0	0	2	0	2	1	1	6	7	0	1	0.142857
65	98.8525	0	99	0	40	0	1	78	29.5	1.73	0	1	0	0	2	0	0	0	1	0	0	0	0	0	0	0	0	3	0	1	2	0	1	0	0	0	0	0	0	2	0	3	0	1	9	10	0	1	0.1
66	54.0656	0	54	0	54.0656	0	2	55	25.9	2.04	0	1	0	0	2	0	0	0	0	1	1	1	0	0	0	0	0	3	0	1	2	0	1	1	0	0	0	0	0	2	0	3	1			2	0	1
67	88.9508	0	89	0	88.9508	0	2	67	34.8	2.12	0	1	1	0	3	1	0	0	0	0	1	1	0	0	0	1	0	3	1	1	2	0	2	0	1	0	0	0	0	2	0	2	1			13	1	1
68	114.197	0	114	0	78.459	0	2	57	24.8	2.09	0	0	0	0	2	0	0	0	0	0	0	0	0	0	0	0	0	3	1	1	2	0	1	1	0	0	0	0	0	x	0	3	0	9	21	30	1	2	0.3
69	105.475	0	105	0	105.475	0	2	57	26	1.88	0	1	0	0	2	0	0	0	0	0	1	0	0	0	0	0	0	3	1	1	2	0	2	1	0	0	0	0	0	x	0	3	0	7	10	17	1	2	0.411765
70	52.8852	1	53	0	35	0	2	72	22.6	1.85	0	0	0	0	2	0	0	0	0	0	0	0	0	0	0	0	0	3	1	1	2	0	2	0	1	1	1	2	1	2	0	3	1	5	4	9	0	2	0.555556
71	23.5082	1	24	1	13	1	1	54	17.4	1.54	0	0	0	0	2	0	0	0	0	0	0	0	0	0	0	0	0	3	1	1	2	0	2	0	1	1	1	2	1	2	0	3	0	3	4	7	0	1	0.428571
72	109.77	0	110	0	109.77	0	2	61	21.8	1.72	0	0	1	0	3	1	0	0	0	0	0	0	0	0	0	0	1	2	0	1	2	0	1	0	0	0	0	0	0	x	0	2	1	2	12	14	1	1	0.142857
73	20.1639	1	6	0	6	0	2	65	25	1.77	0	0	0	0	2	0	0	0	0	0	0	0	0	0	0	0	0	3	1	1	2	0	3	0	0	0	0	0	0	2	0	2	0	1	12	13	1	1	0.0769231
74	113.377	0	113	0	21.1148	0	1	51	22.8	1.57	0	0	0	0	2	0	0	0	0	0	0	0	0	0	0	0	0	3	1	1	2	1	2	0	0	0	0	0	0	x	0	3	0	1	25	26	1	1	0.0384615
75	111.246	0	111	0	85.377	0	2	41	30.8	2.07	0	0	0	0	2	0	0	0	0	0	0	0	0	0	0	0	0	3	1	1	2	0	2	1	1	1	2	2	1	x	0	3	0	1	20	21	1	1	0.047619
76	52.1967	1	52	1	21	1	2	58	29	1.83	0	0	0	0	2	0	0	0	0	0	0	0	0	0	0	0	0	3	1	1	2	0	2	0	0	0	0	0	0	2	0	2	0	1	5	6	0	1	0.166667
77	26	1	26	0	20	0	2	66	19.9	1.55	0	0	0	0	2	0	0	0	0	0	0	0	0	0	0	0	0	3	1	5	2	0	1	0	1	1	1	1	1	2	0	3	1	3	15	18	1	1	0.166667
78	88.5902	1	89	0	85	0	2	65	27.1	1.82	0	0	0	0	2	0	0	0	0	0	0	0	0	0	0	0	0	2	1	3	3	1	2	0	0	0	0	0	0	2	0	3	1			6	0	1
79	44.1311	1	44	1	23	1	1	42	26.6	1.71	0	0	0	0	2	0	0	0	0	0	0	0	0	0	0	0	0	3	1	4	3	1	1	0	1	1	1	2	1	2	0	2	0	9	9	18	1	2	0.5
80	73.9016	1	74	0	73.6721	0	2	71	23.3	1.61	0	1	0	0	2	0	0	0	1	1	0	0	0	0	0	0	0	3	1	4	3	1	1	0	0	0	0	0	0	2	0	3	0	5	21	26	1	2	0.192308
81	65.6393	0	66	0	57.4754	0	2	74	27.7	1.93	0	0	0	0	2	0	0	0	0	0	0	0	0	0	0	0	0	3	1	4	3	1	3	0	0	0	0	0	0	2	0	3	0	2	9	11	0	1	0.181818
82	90.1967	0	90	0	73.6721	0	1	67	24.8	1.65	0	1	0	0	2	0	0	0	0	0	0	1	0	0	0	0	0	4	1	4	3	1	2	0	0	0	0	0	0	3	1	3	0	2	7	9	0	1	0.222222
83	75.2787	0	75	0	75.2787	0	2	66	22.2	1.74	0	0	0	0	2	0	0	0	0	0	0	0	0	0	0	0	0	3	0	4	3	1	2	0	0	0	0	0	0	x	1	3	0	1	17	18	1	1	0.0555556
84	66.459	0	66	0	31	1	2	47	27.8	2.07	0	0	0	0	2	0	0	0	0	0	0	0	0	0	0	0	0	3	1	4	3	0	2	0	0	0	0	0	0	3	0	3	0	1	23	24	1	1	0.0416667
85	27.0164	1	27	1	16	1	2	51	22.8	1.77	0	0	0	0	2	0	0	0	0	0	0	0	0	0	0	0	0	4	1	4	3	1	1	1	1	0	0	0	1	2	0	3	0	1	13	14	1	1	0.0714286
86	79.1803	1	79	0	70	0	2	65	19.5	1.82	0	0	0	0	2	0	0	0	0	0	0	0	0	0	0	0	0	3	1	4	3	1	2	0	0	0	0	0	0	2	0	3	0	1	12	13	1	1	0.0769231
87	51.7049	0	52	0	52	0	2	43	20.02	1.76	0	0	0	0	2	0	0	0	0	0	0	0	0	0	0	0	0	3	1	4	3	1	3	0	0	0	0	0	0	3	0	3	0	4	11	15	1	2	0.266667
88	52.2295	1	52	1	36	1	2	57	21.5	1.85	0	0	0	0	2	0	0	0	0	0	0	0	0	0	0	0	0	3	0	2	3	1	1	1	0	0	0	0	0	2	0	3	0	1	12	13	1	1	0.0769231
89	15.6066	1	16	1	10	1	2	64	29.2	2.24	0	0	0	0	2	0	0	0	0	0	0	0	0	0	0	0	0	3	1	2	3	1	2	0	1	1	1	2	1	2	0	3	1			15	1	1
90	44.1967	0	44	0	44.1967	0	1	52	36.2	1.87	0	1	1	1	3	1	0	0	0	1	0	1	0	0	0	0	0	3	1	4	3	1	3	0	0	0	0	0	0	2	0	3	1			7	0	1
91	39.4426	1	39	0	34.2295	0	2	72	23.5	1.87	1	0	0	0	3	1	0	1	0	0	0	0	0	0	0	0	0	3	1	2	2	0	2	0	0	0	0	0	0	x	0	3	0	16	7	23	1	2	0.695652
92	130.262	0	130	0	130.262	0	1	33	19.3	1.44	0	0	0	0	2	0	0	0	0	0	0	0	0	0	0	0	0	3	1	2	2	0	2	0	0	0	0	0	0	2	0	2	0	5	9	14	1	2	0.357143
93	136.328	0	136	0	89.9672	0	2	61	26.3	2.16	1	0	1	0	4	1	0	0	0	0	0	0	0	0	0	0	1	3	1	2	2	0	1	0	0	0	0	0	0	x	0	3	0	5	14	19	1	2	0.263158
94	136.721	0	137	0	126.852	0	2	54	28.4	1.94	0	0	0	0	2	0	0	0	0	0	0	0	0	0	0	0	0	3	1	2	2	0	1	0	1	0	0	0	0	x	0	3	0	3	12	15	1	1	0.2
95	32.8852	1	33	1	32	1	2	65	25.5	1.83	0	0	0	0	2	0	0	0	0	0	0	0	0	0	0	0	0	3	1	2	2	0	2	0	1	1	1	2	1	2	0	3	0	1	15	16	1	1	0.0625
96	161.148	0	161	0	52	1	1	53	37.3	1.89	0	1	1	1	3	1	0	1	0	0	0	0	0	0	0	0	0	3	1	2	2	0	1	0	1	1	2	1	1	2	0	3	0	1	14	15	1	1	0.0666667
97	15.6721	1	16	1	10	1	1	67	35.7	1.98	0	1	1	1	3	1	0	0	1	0	0	0	0	0	0	0	0	3	1	2	2	0	1	0	0	0	0	0	0	2	0	3	0	1	12	13	1	1	0.0769231
98	147.016	0	147	0	36	0	2	76	37.2	2.05	0	1	0	0	2	0	1	1	0	0	1	1	0	0	0	0	0	3	0	2	2	0	3	0	0	0	0	0	0	2	0	3	0	1	15	16	1	1	0.0625
99	105.41	1	105	1	104.361	0	2	70	20.9	1.78	0	0	0	0	3	1	0	0	0	0	0	0	0	0	0	0	0	2	0	2	2	0	2	0	0	0	0	0	0	2	0	3	0	1	12	13	1	1	0.0769231
100	158.328	0	158	0	148.361	0	2	58	25.7	2.16	0	1	0	0	2	0	0	0	0	1	1	0	0	0	0	0	0	3	0	1	2	0	1	1	0	0	0	0	0	2	0	3	0	11	2	13	1	2	0.846154
101	129.508	0	130	0	130	0	1	59	26.7	1.65	0	0	0	0	3	1	0	0	0	0	0	0	0	0	0	0	0	3	0	1	2	0	2	0	0	0	0	0	0	2	0	3	0	4	6	10	0	2	0.4
102	37.6721	1	38	1	12	1	2	60	26.6	1.91	0	1	1	0	3	1	0	0	1	1	0	0	0	0	1	1	0	3	1	1	2	0	1	1	0	0	0	0	0	x	0	3	0	3	1	4	0	1	0.75
103	31.377	1	31	1	14	1	2	80	25	1.61	0	1	1	0	3	1	0	1	1	1	0	0	0	0	1	0	0	3	1	1	2	0	1	0	0	0	0	0	0	x	0	2	0	3	5	8	0	1	0.375
104	46.8197	1	47	1	25	1	2	70	27	1.96	0	1	0	0	2	0	0	0	1	0	0	0	0	0	0	0	0	3	1	1	2	0	2	0	0	0	0	0	0	3	0	3	0	3	7	10	0	1	0.3
105	128.59	0	129	0	128.59	0	2	61	31.1	2.1	0	0	0	0	2	0	0	0	0	0	0	0	0	0	0	0	0	3	0	1	2	0	1	0	0	0	0	0	0	2	0	3	0	2	8	10	0	1	0.2
106	146.328	0	146	0	129.836	0	2	34	25.7	1.89	0	0	0	0	2	0	0	0	0	0	0	0	0	0	0	0	0	3	0	1	2	0	1	0	1	1	1	2	1	1	0	3	0	2	15	17	1	1	0.117647
107	121.836	0	122	0	86.4918	0	2	55	30.4	2.01	0	1	0	0	2	0	0	1	0	0	0	0	0	0	0	0	0	3	1	1	2	0	2	0	0	0	0	0	0	2	0	3	1	1	16	17	1	1	0.0588235
108	118.656	0	119	0	110	0	1	42	51.5	2.59	0	0	0	0	2	0	0	0	0	0	0	0	0	0	0	0	0	3	1	1	2	0	3	0	1	0	0	0	0	2	0	2	0	1	16	17	1	1	0.0588235
109	109.836	0	110	0	40.2951	0	1	71	25	1.69	1	0	0	0	3	1	0	1	0	0	0	0	0	1	0	0	0	2	1	1	2	0	1	0	0	0	0	0	0	x	0	0	0	1	10	11	0	1	0.0909091
110	4.42623	1	4	0	3	0	1	66	26.3	1.74	0	0	0	0	2	0	0	0	0	0	0	0	0	0	0	0	0	3	0	1	2	0	1	0	0	0	0	0	0	x	0	3	0	1	3	4	0	1	0.25
111	137.246	0	137	0	125.607	0	2	64	22.1	1.74	1	1	0	0	3	1	0	1	0	0	0	0	0	0	0	0	0	3	0	1	2	0	1	0	0	0	0	0	0	x	0	2	0	1	14	15	1	1	0.0666667
112	83.0164	1	83	0	65.7377	0	1	76	33.7	1.85	0	1	0	0	3	1	0	0	1	1	0	0	0	0	0	0	0	3	1	1	2	0	1	0	1	0	0	0	0	2	0	2	1			12	1	1
[truncated: 12 more columns]
